# Supplementary material
Source: MDPI journal article supplement (https://www.mdpi.com/2073-4395/11/10/1940)
Supplement: s1 [file s1]

**Table S1.** Differences in physiological parameters compared to the values before HS. Single asterisk indicates a significant difference,  $p < 0.05$ ; double asterisk indicates a statistical difference,  $p < 0.01$ ; triple asterisk indicates a statistical difference,  $p < 0.001$ ; ns indicates not significant difference ( $p > 0.05$ ).

| Physiological parameter | Difference (%)  |             |             |              |                  |              |              |              |
|-------------------------|-----------------|-------------|-------------|--------------|------------------|--------------|--------------|--------------|
|                         | After HS-2 days |             |             |              | After HS-10 days |              |              |              |
|                         | SI+             | SPRI        | SI          | SDI          | SI+              | SPRI         | SI           | SDI          |
| Stem water potential    | +29.66 (***)    | +18.77 (**) | +9.45 (ns)  | -25.55 (***) | +35.52 (***)     | +25.72 (***) | +14.67 (*)   | -34.83 (***) |
| Photosynthesis          | -12.05 (ns)     | +0.72 (ns)  | +0.72 (ns)  | -50.97 (***) | -5.66 (ns)       | -5.08 (ns)   | +2.30 (ns)   | -20.19 (**)  |
| Stomatal conductance    | -20.65 (**)     | -4.85 (ns)  | -15.65 (ns) | -64.96 (***) | -36.84 (***)     | -19.56 (ns)  | -19.80 (*)   | -48.72 (**)  |
| Transpiration rate      | -4.71 (ns)      | +8.49 (ns)  | +2.16 (ns)  | -54.78 (***) | -35.48 (***)     | -30.69 (***) | -56.35 (***) | -34.63 (***) |
| Water use efficiency    | +11.07 (ns)     | +6.05 (ns)  | +19.09 (ns) | +39.45 (**)  | +47.78 (*)       | +12.55 (ns)  | +28.19 (ns)  | +51.78 (***) |

**Table S2.** Differences in VIs compared to the values before HS. Single asterisk indicates a significant difference,  $p < 0.05$ ; double asterisk indicates a statistical difference,  $p < 0.01$ ; triple asterisk indicates a statistical difference,  $p < 0.001$ ; ns indicates not significant difference ( $p > 0.05$ ).

| VI          | Difference (%)  |             |             |               |                  |              |              |              |
|-------------|-----------------|-------------|-------------|---------------|------------------|--------------|--------------|--------------|
|             | After HS-2 days |             |             |               | After HS-10 days |              |              |              |
|             | SI+             | SPRI        | SI          | SDI           | SI+              | SPRI         | SI           | SDI          |
| EVI         | -2.56 (ns)      | -6.24 (**)  | -0.78 (ns)  | -7.92 (***)   | -7.73 (***)      | -7.49 (***)  | -5.74 (*)    | -11.42 (***) |
| GI          | -6.64 (ns)      | -3.73 (ns)  | +0.98 (ns)  | +22.35 (***)  | -12.98 (**)      | -7.15 (ns)   | -13.43 (**)  | +4.11 (ns)   |
| GNDVI       | -1.29 (ns)      | +1.57 (ns)  | -0.15 (ns)  | -16.45 (***)  | -3.58 (*)        | +2.71 (ns)   | +4.37 (ns)   | -10.48 (***) |
| MSR         | -3.15 (ns)      | -10.07 (**) | -1.24 (ns)  | -8.09 (*)     | -11.61 (***)     | -11.75 (***) | -6.86 (ns)   | -12.37 (***) |
| NDGI        | -9.25 (ns)      | -5.66 (ns)  | +3.28 (ns)  | +32.64 (***)  | -19.25 (***)     | -11.03 (ns)  | -19.13 (**)  | +7.23 (ns)   |
| NDVI        | -1.07 (ns)      | -3.43 (ns)  | +1.68 (ns)  | -2.19 (ns)    | -4.36 (*)        | -4.02 (*)    | -0.45 (ns)   | -3.96 (*)    |
| SRI         | +5.71 (ns)      | -7.96 (ns)  | -1.96 (ns)  | -24.76 (***)  | +1.02 (ns)       | -7.69 (ns)   | +4.75 (ns)   | -17.70 (***) |
| TCARI       | -8.93 (ns)      | +22.99 (ns) | +16.11 (ns) | +76.90 (***)  | -10.16 (ns)      | +13.24 (ns)  | -11.91 (ns)  | +35.95 (**)  |
| VARI        | -7.63 (ns)      | -5.65 (ns)  | -2.17 (ns)  | +19.15 (***)  | -19.98 (***)     | -13.13 (*)   | -22.74 (***) | -1.55 (ns)   |
| PRI         | -31.63 (ns)     | -32.41 (ns) | -33.77 (ns) | -121.92 (***) | -43.78 (*)       | -60.82 (**)  | -45.78 (ns)  | -37.42 (ns)  |
| TCARI/OSAVI | -8.61 (ns)      | +34.73 (ns) | +22.99 (ns) | +125.63 (***) | -2.98 (ns)       | +11.36 (ns)  | -8.52 (ns)   | +67.13 (***) |
| WBI         | -0.40 (ns)      | -0.36 (ns)  | -0.12 (ns)  | -0.16 (ns)    | -0.48 (ns)       | -0.73 (**)   | -0.03 (ns)   | -0.21 (ns)   |
